# Supplementary material for: ATP-induced asymmetric pre-protein folding as a driver of protein translocation through the Sec machinery
Source: eLife journal article supplement (doi:10.7554/elife.41803), 2019-01-02
Supplement: supp [file elife-41803-supp-v1.zip]

Archive with 12 entries (12 files):
- elife_poa_e41803_Figure_5_figure_supplement_2.pdf
- elife_poa_e41803_Figure_6_figure_supplement_1.pdf
- elife_poa_e41803_Figure_2_figure_supplement_1.pdf
- elife_poa_e41803_Figure_3_figure_supplement_1.pdf
- elife_poa_e41803_Figure_1_figure_supplement_1.pdf
- elife_poa_e41803_Figure_4_figure_supplement_1.pdf
- elife_poa_e41803_Figure_2_figure_supplement_4.pdf
- elife_poa_e41803_Figure_2_figure_supplement_2.pdf
- elife_poa_e41803_Figure_3_figure_supplement_2.pdf
- elife_poa_e41803_Figure_5_figure_supplement_1.pdf
- elife_poa_e41803_Transparent_Reporting_File.docx
- elife_poa_e41803_Figure_2_figure_supplement_3.pdf
