# Supplementary figures and images for: ATP-induced asymmetric pre-protein folding as a driver of protein translocation through the Sec machinery
Source: eLife journal article supplement (doi:10.7554/elife.41803), 2019-01-02

Figure 5 – figure supplement 2

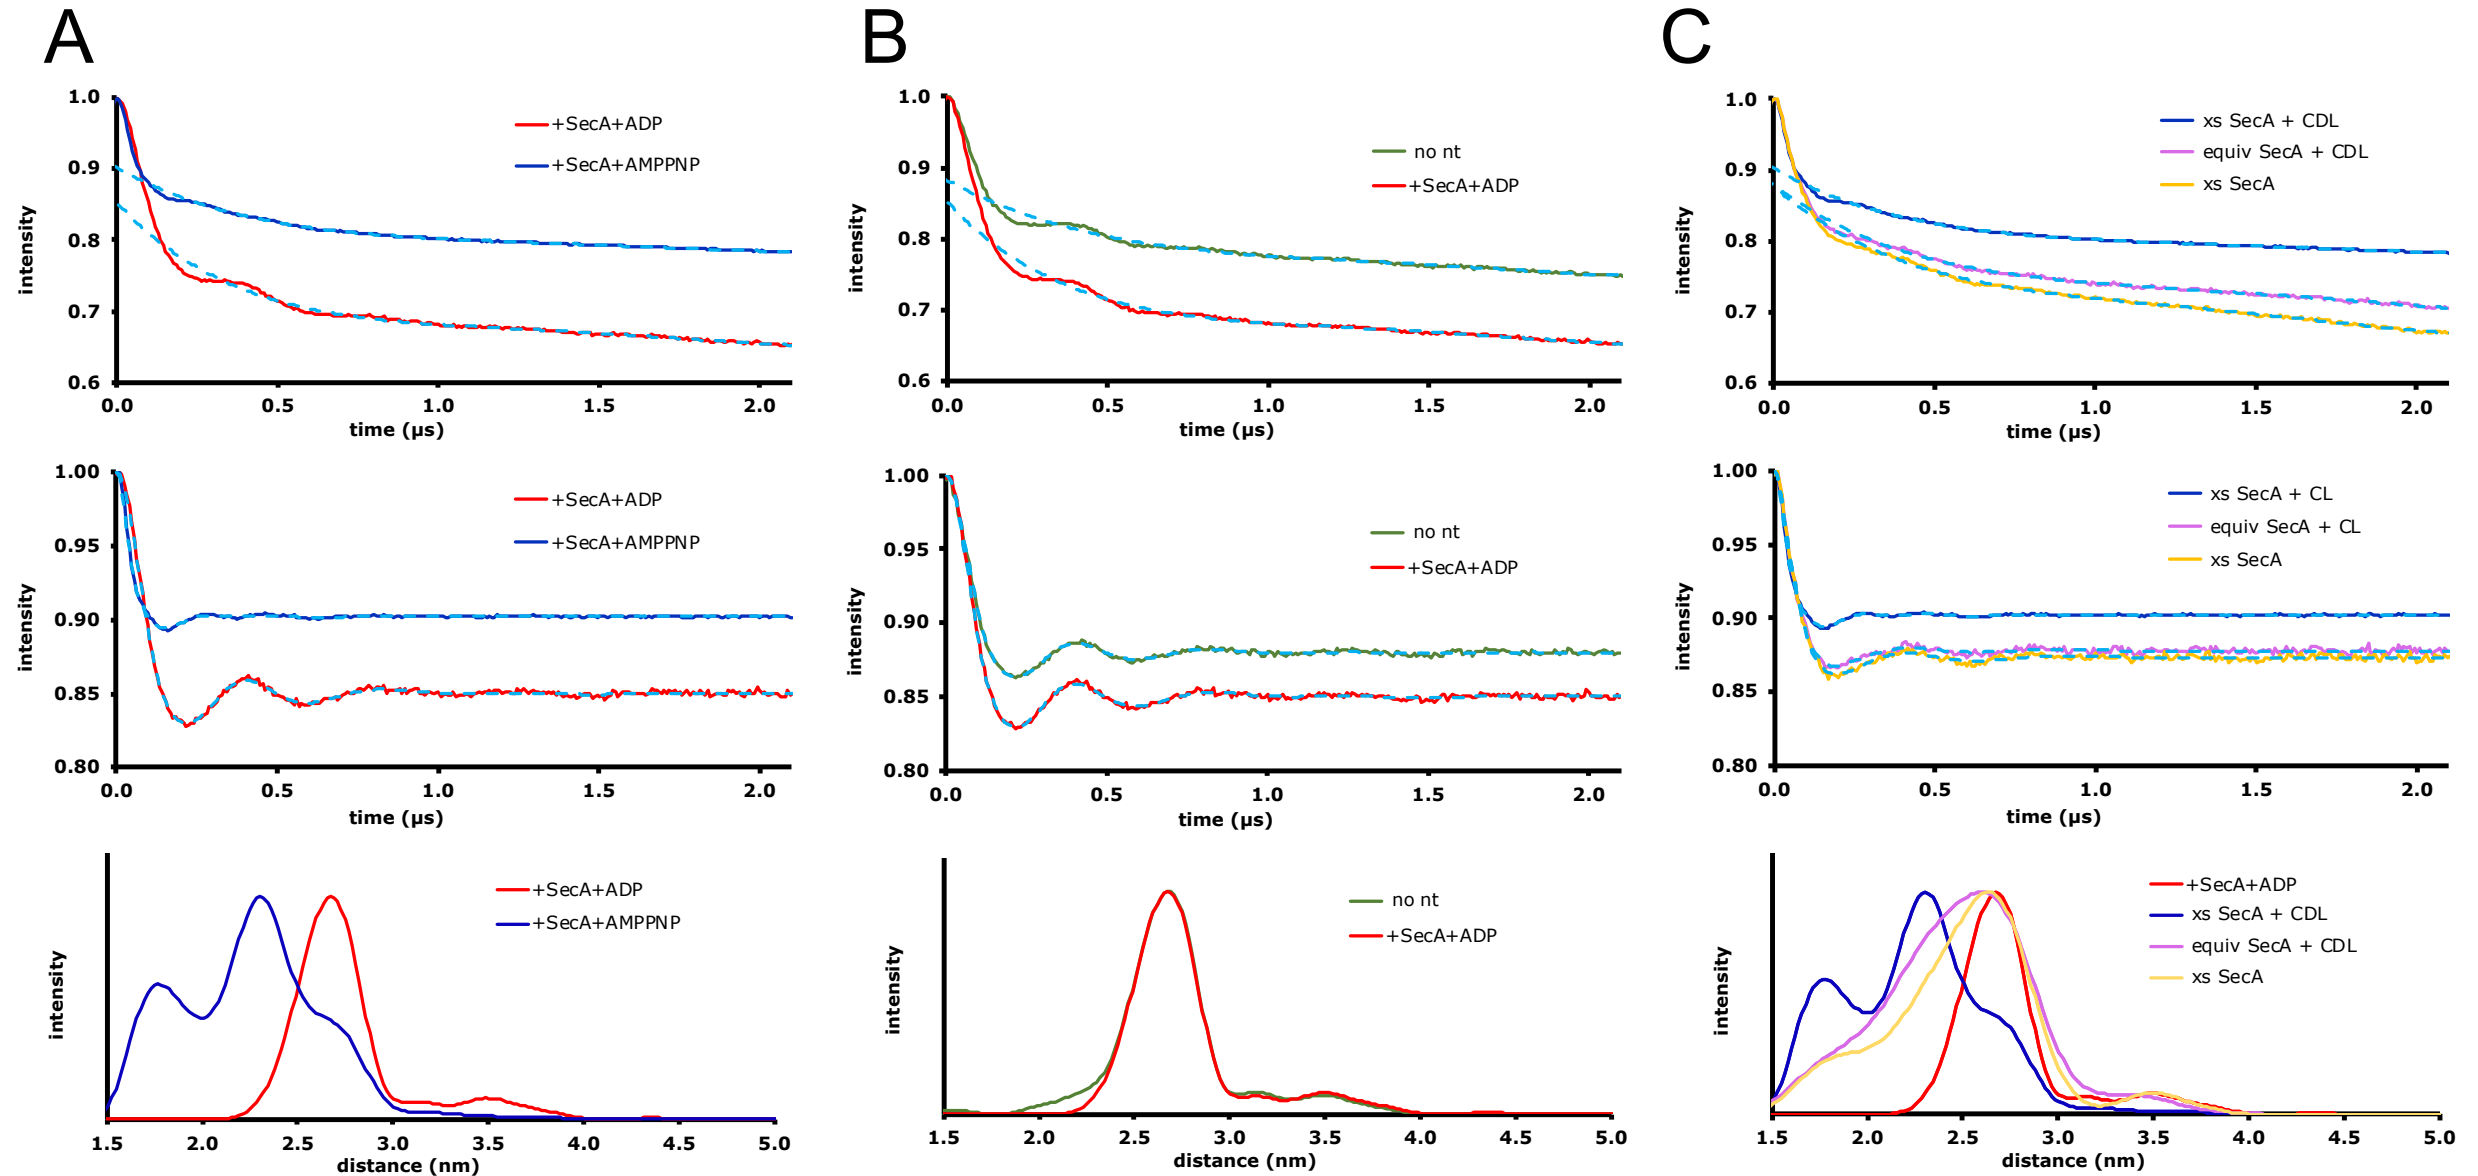

Supplement: supp [file elife-41803-supp-v1.zip › elife_poa_e41803_Figure_5_figure_supplement_2.pdf]

Figure 6 – figure supplement 1

A

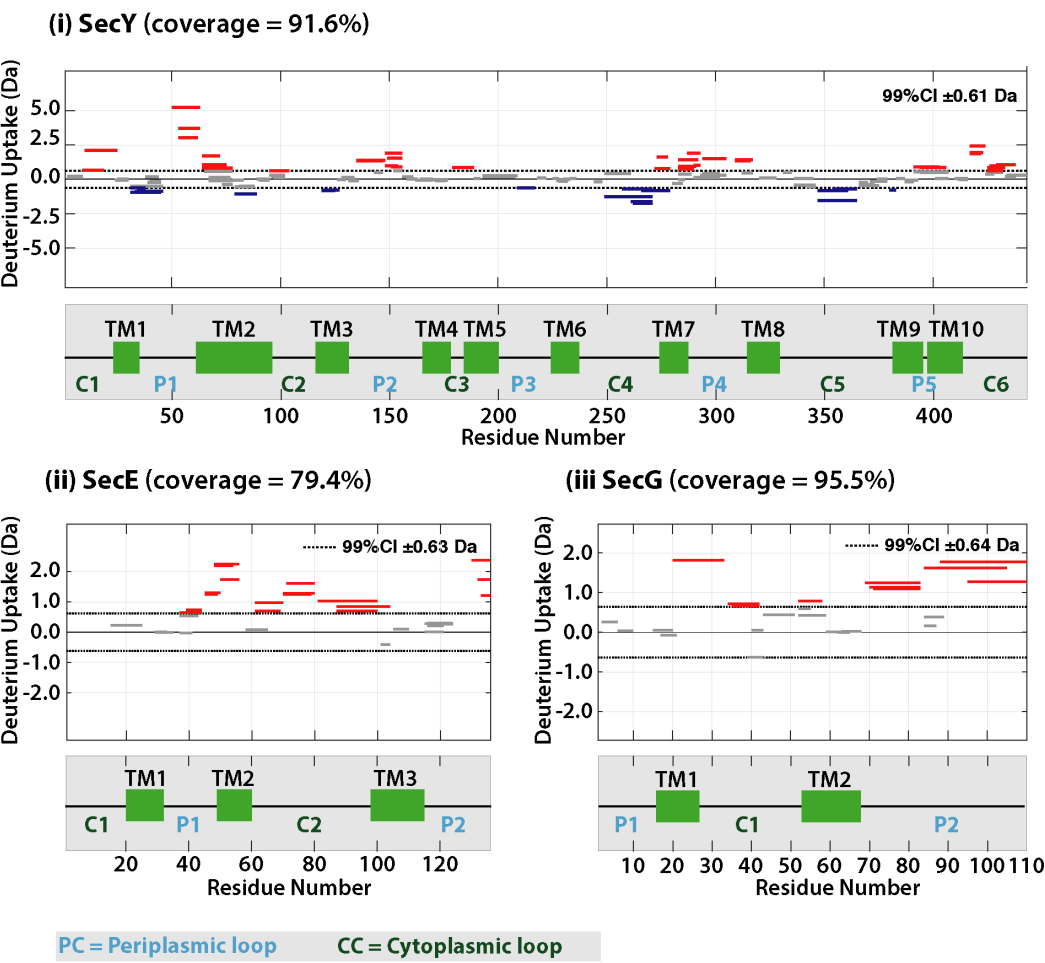

B

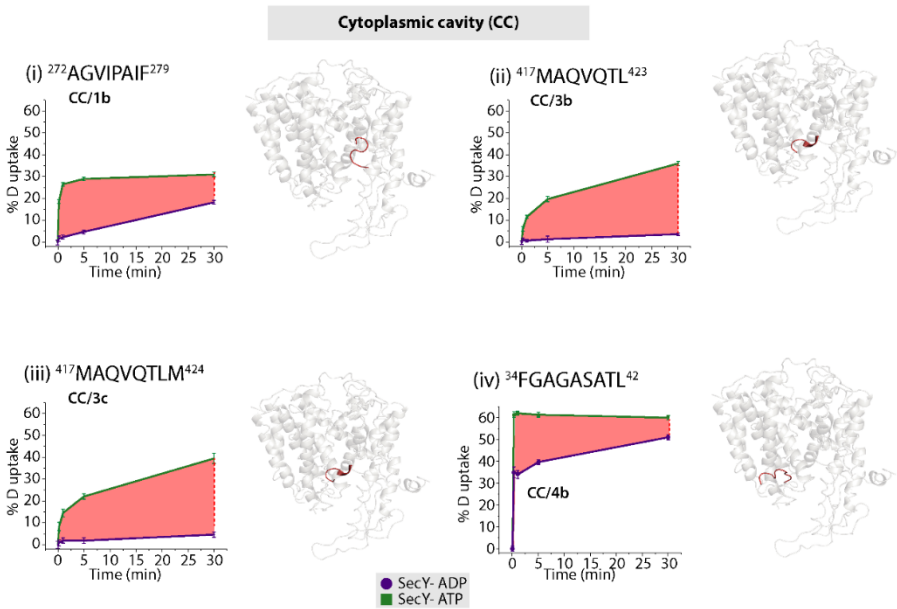

C

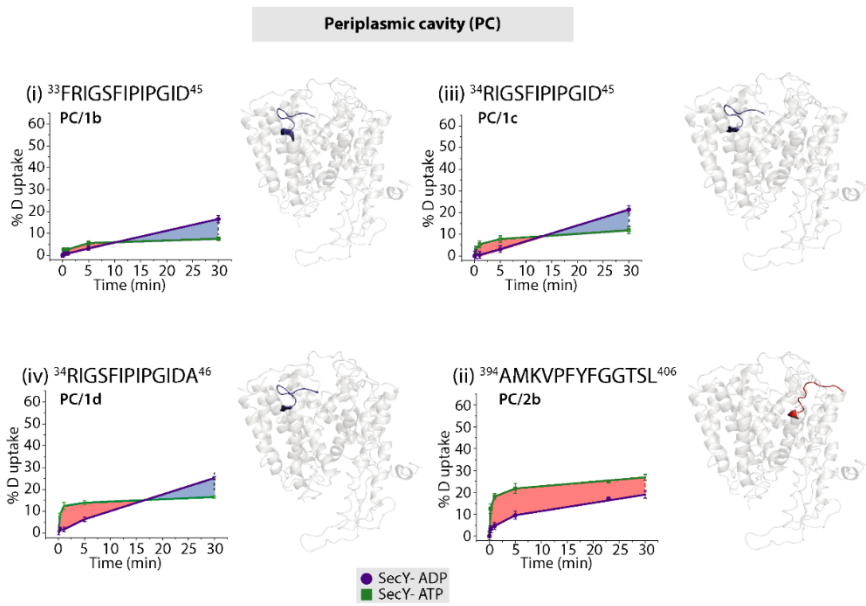

Figure 6 – figure supplement 1

D

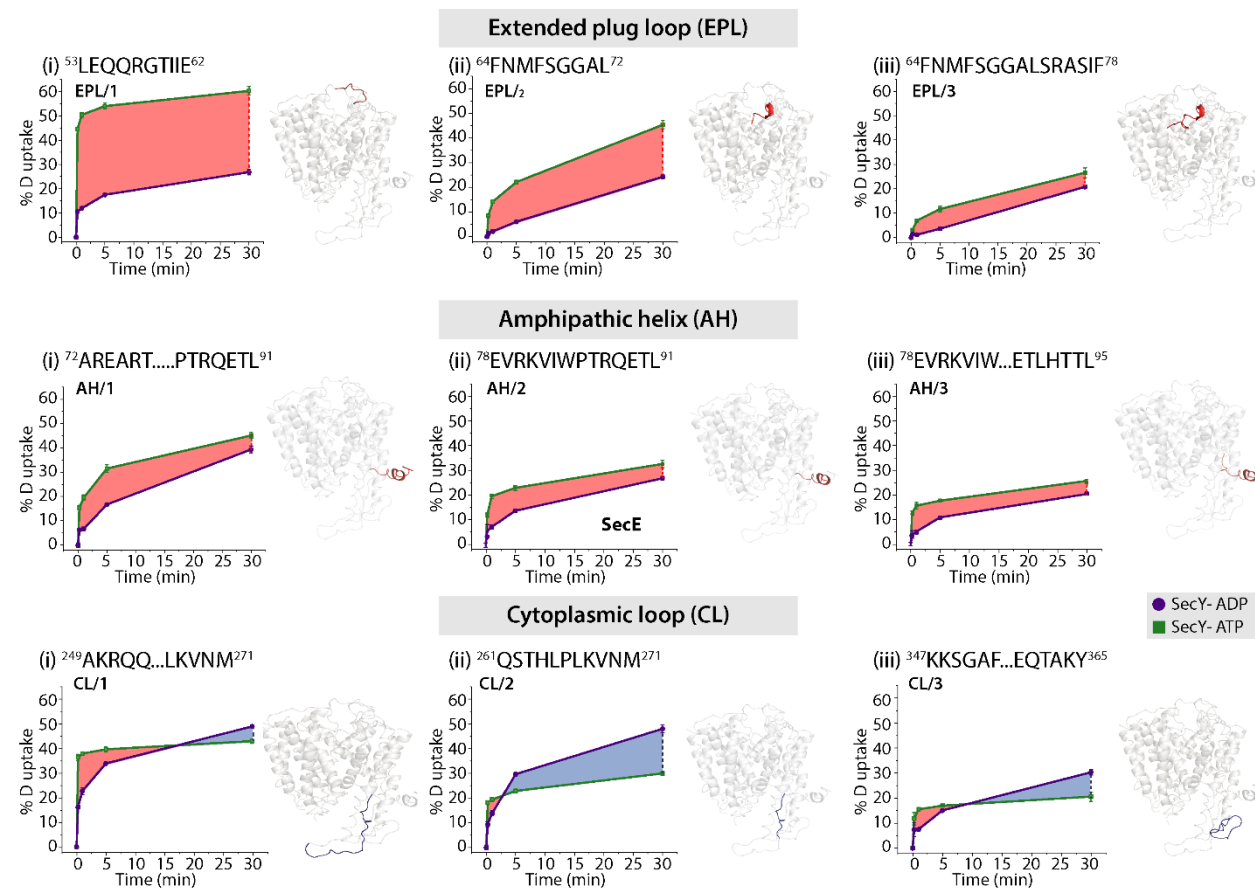

E

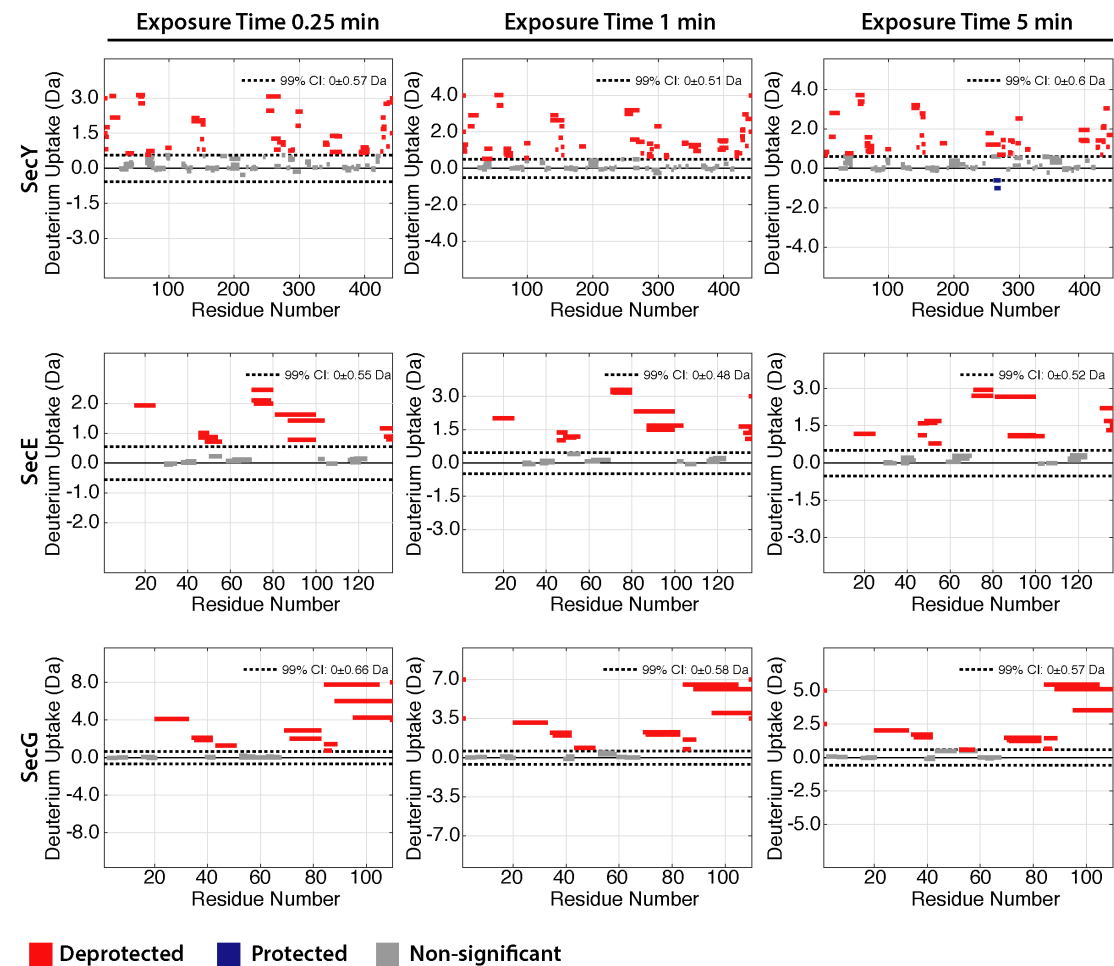

Figure 6 – figure supplement 1

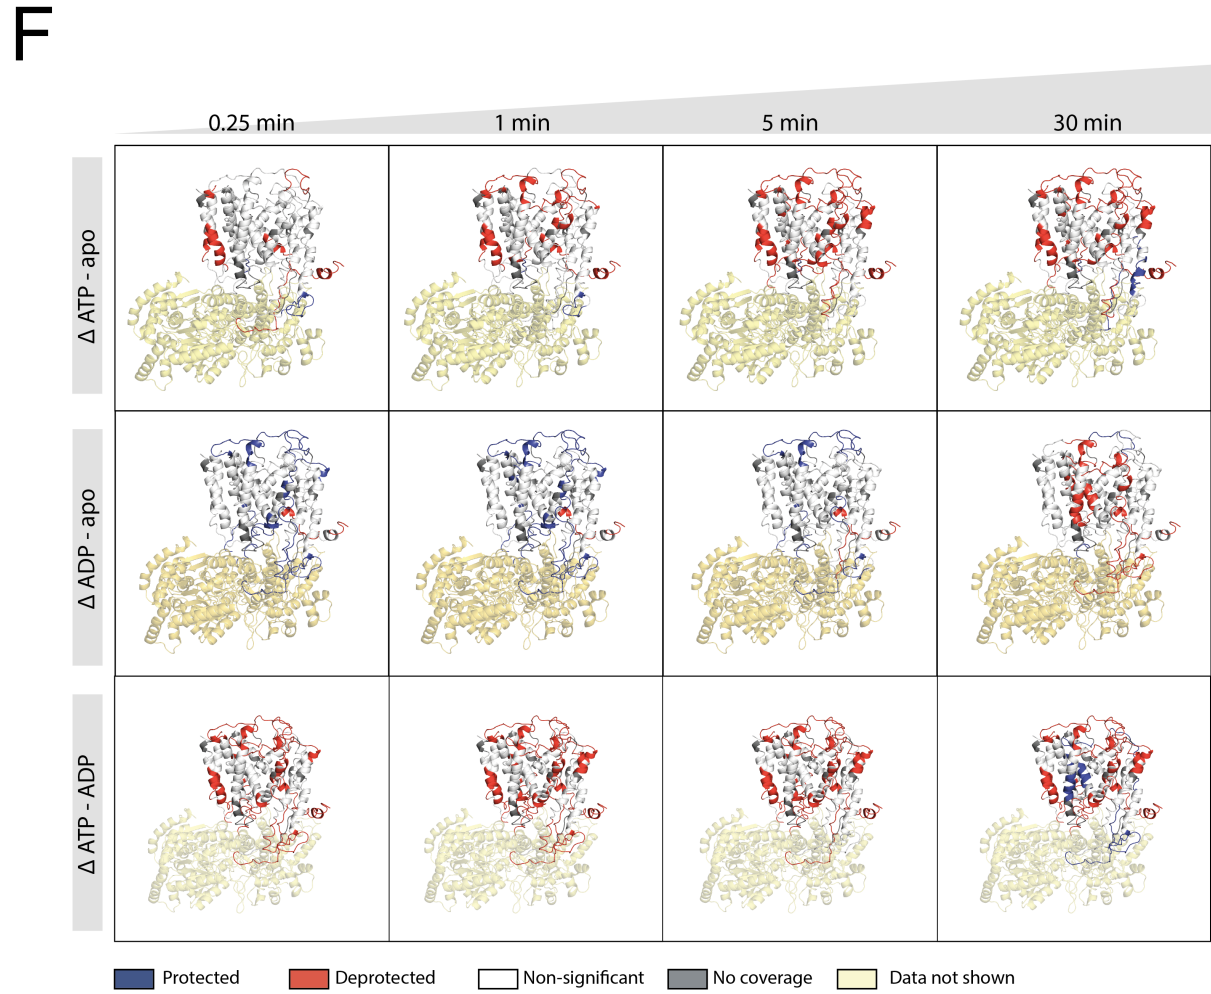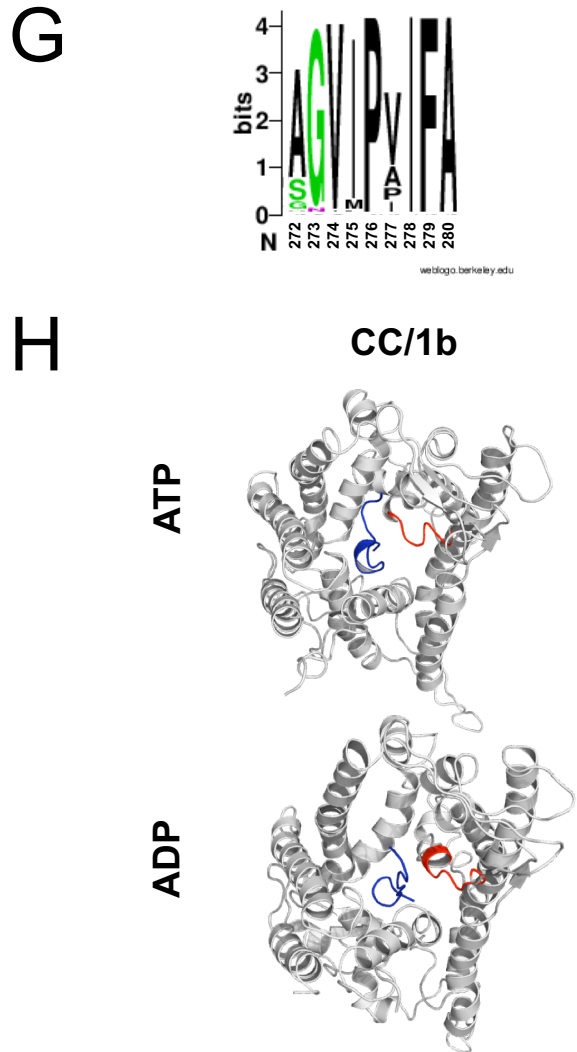

Supplement: supp [file elife-41803-supp-v1.zip › elife_poa_e41803_Figure_6_figure_supplement_1.pdf]

**Figure 2 – figure supplement 1**

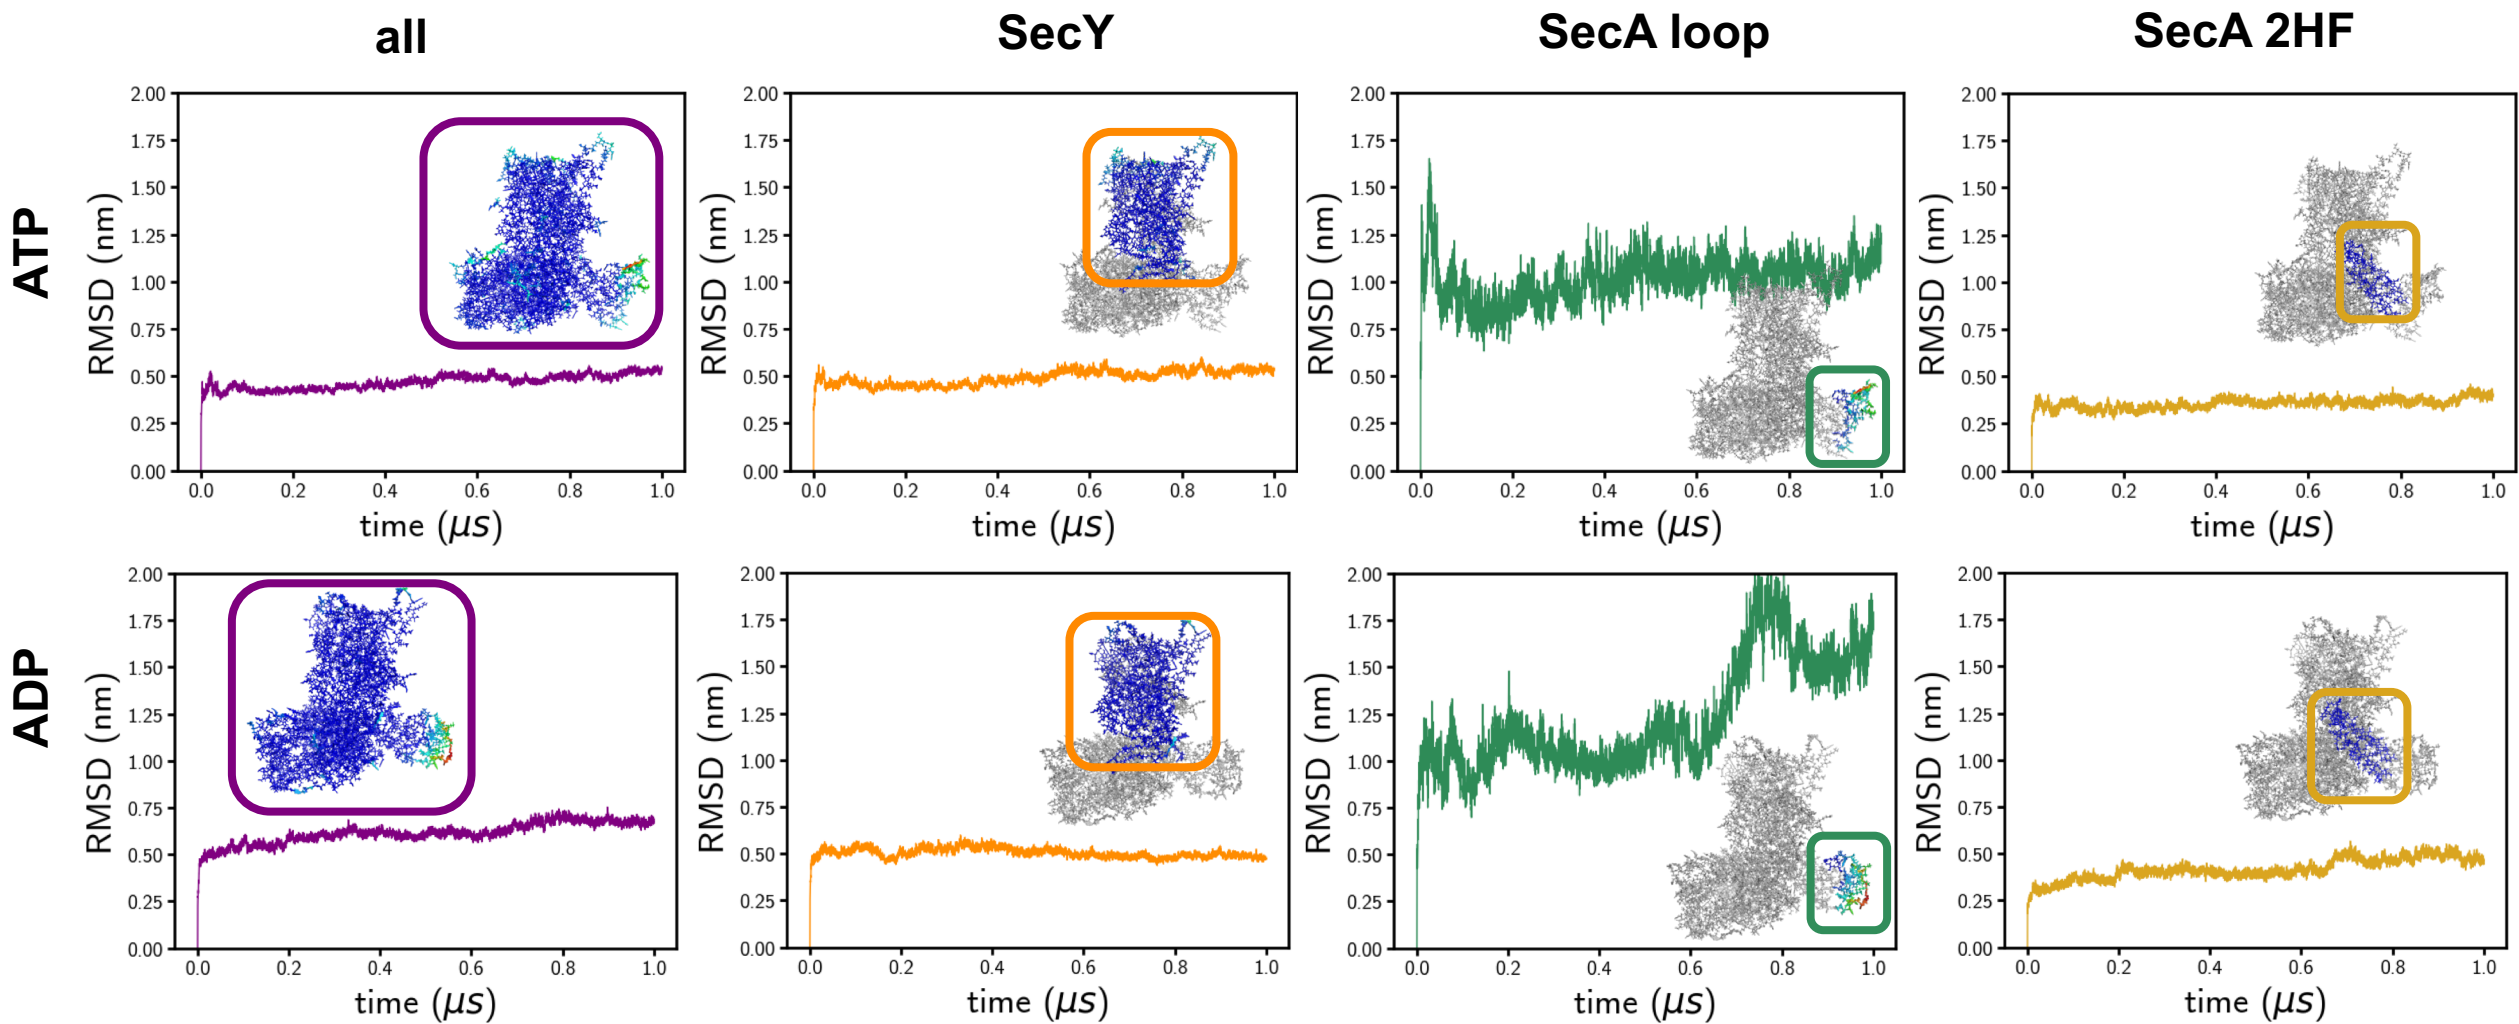

Supplement: supp [file elife-41803-supp-v1.zip › elife_poa_e41803_Figure_2_figure_supplement_1.pdf]

**Figure 3 – figure supplement 1**

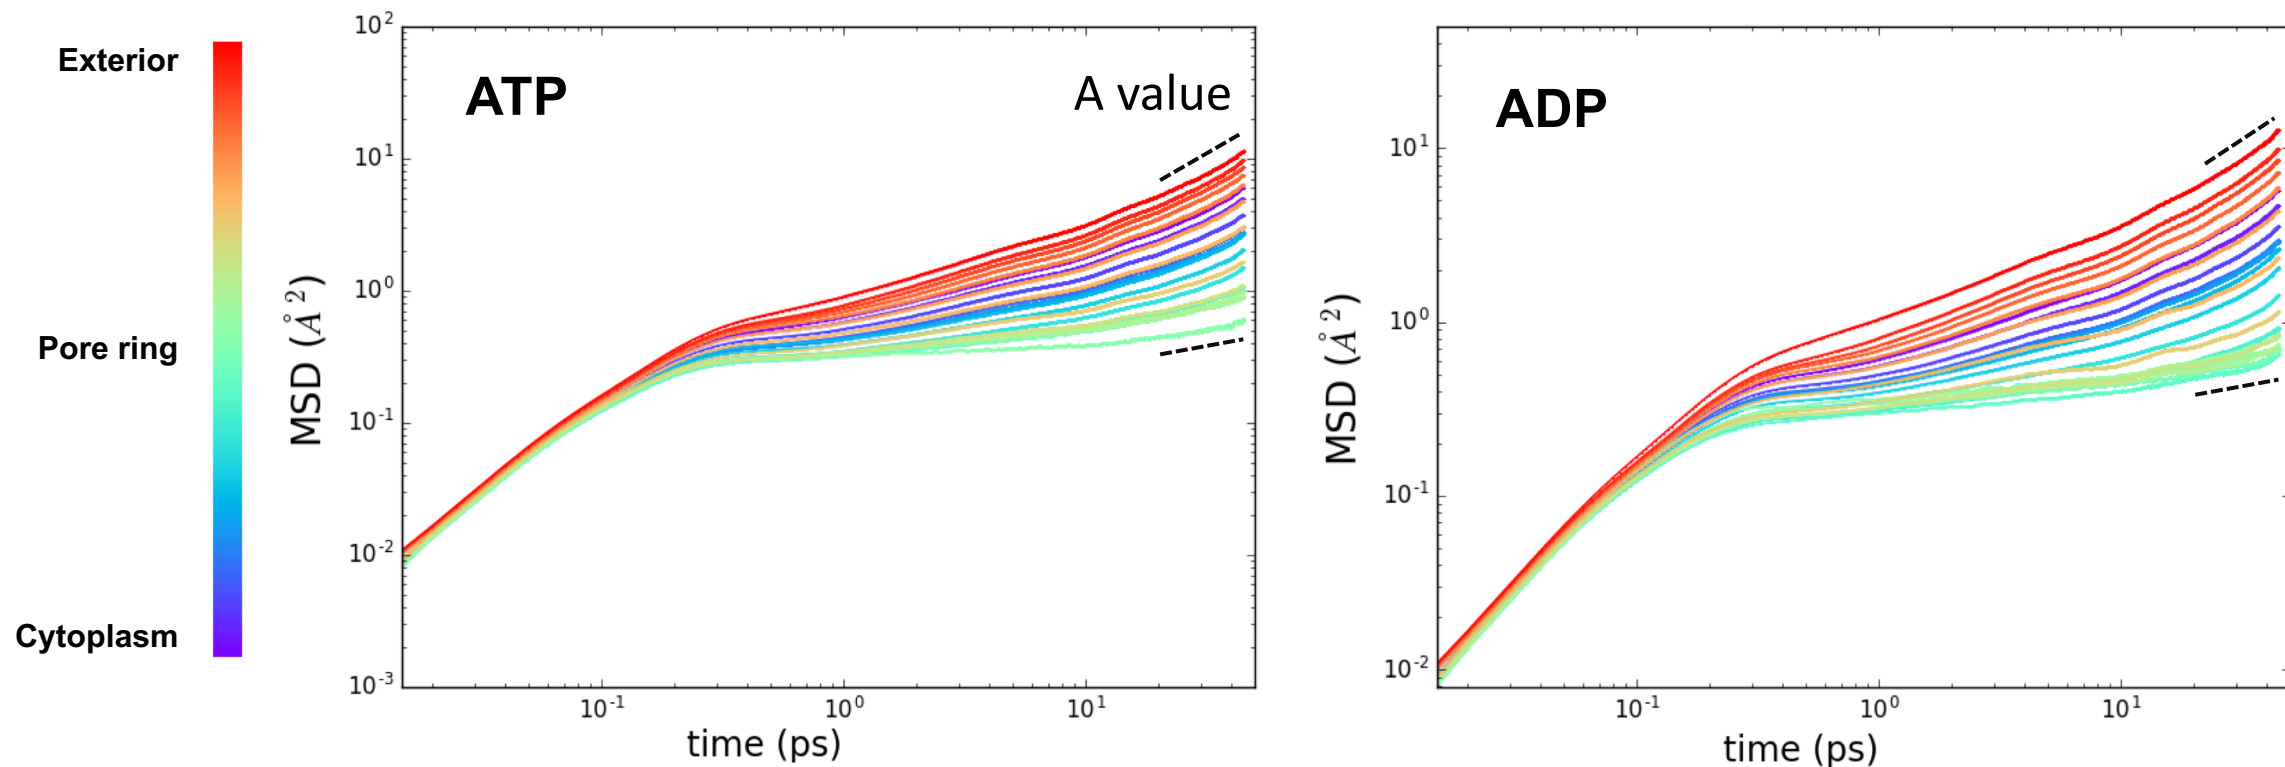

Supplement: supp [file elife-41803-supp-v1.zip › elife_poa_e41803_Figure_3_figure_supplement_1.pdf]

**Figure 1 – figure supplement 1**

**A**

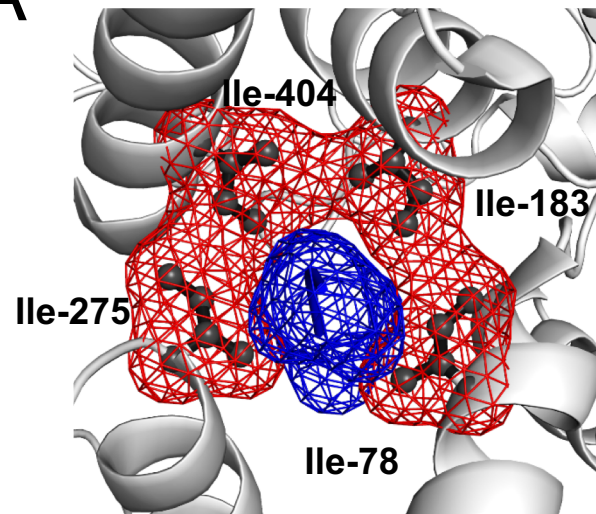

**B**

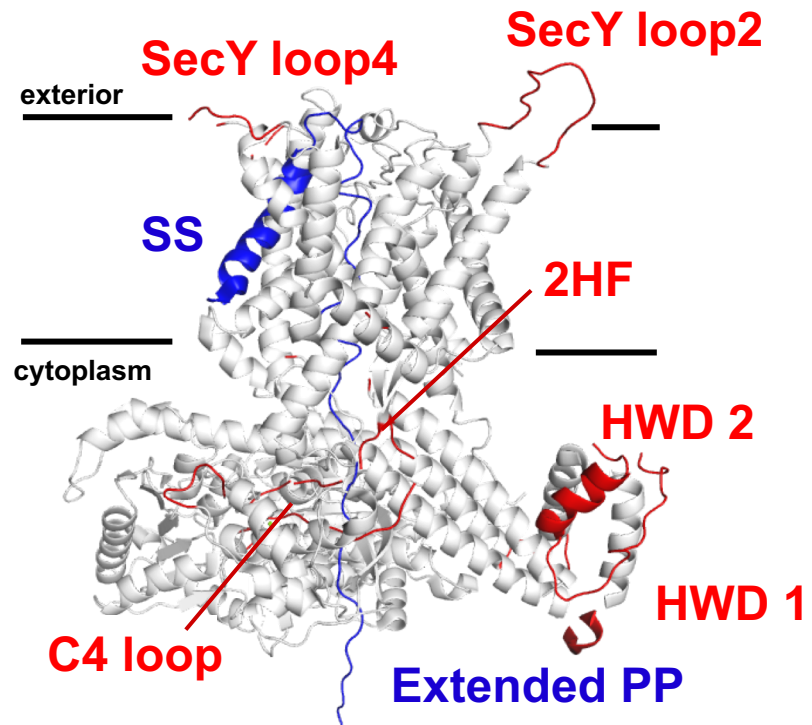

**C**

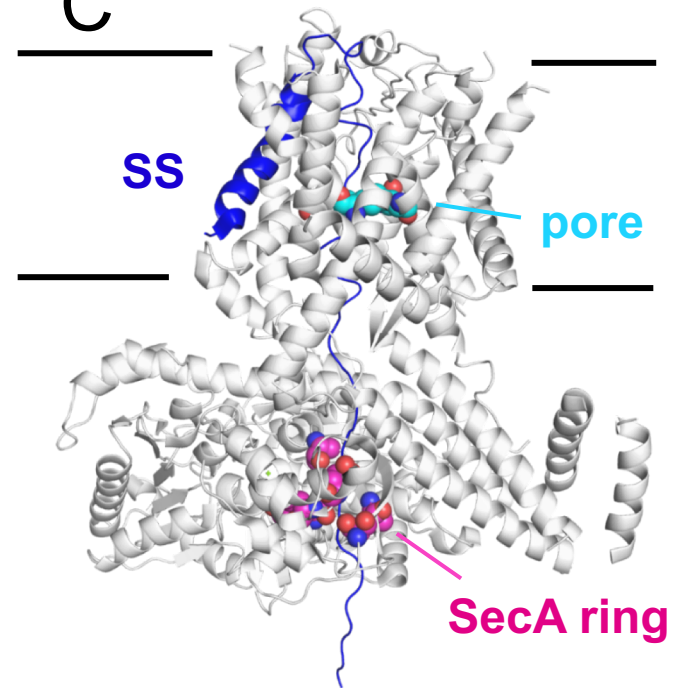

Supplement: supp [file elife-41803-supp-v1.zip › elife_poa_e41803_Figure_1_figure_supplement_1.pdf]

**Figure 4 – figure supplement 1**

**A**

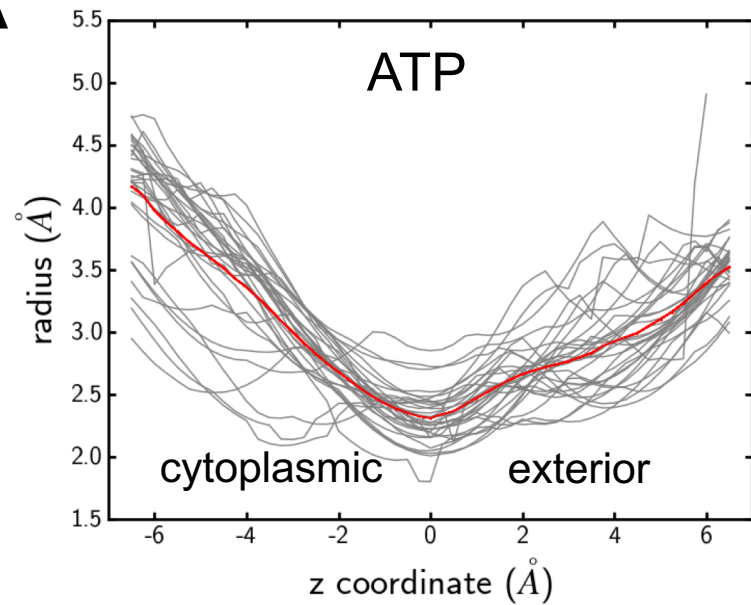

**B**

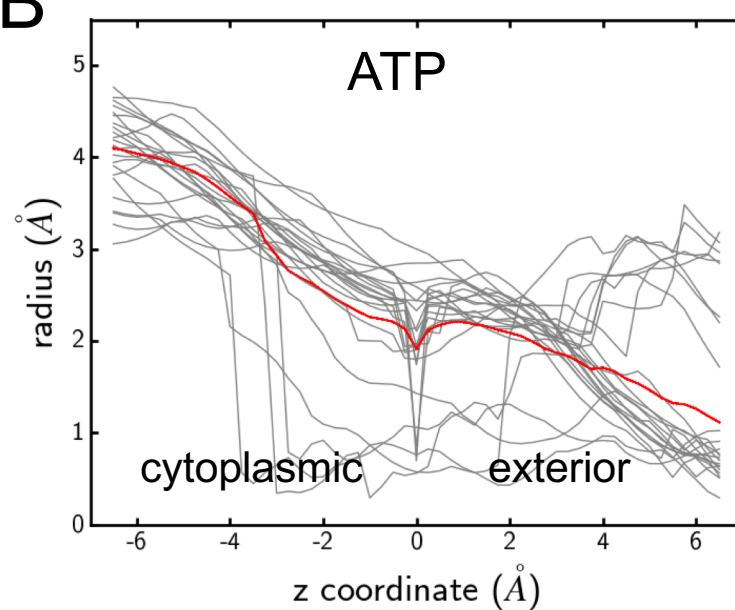

**C**

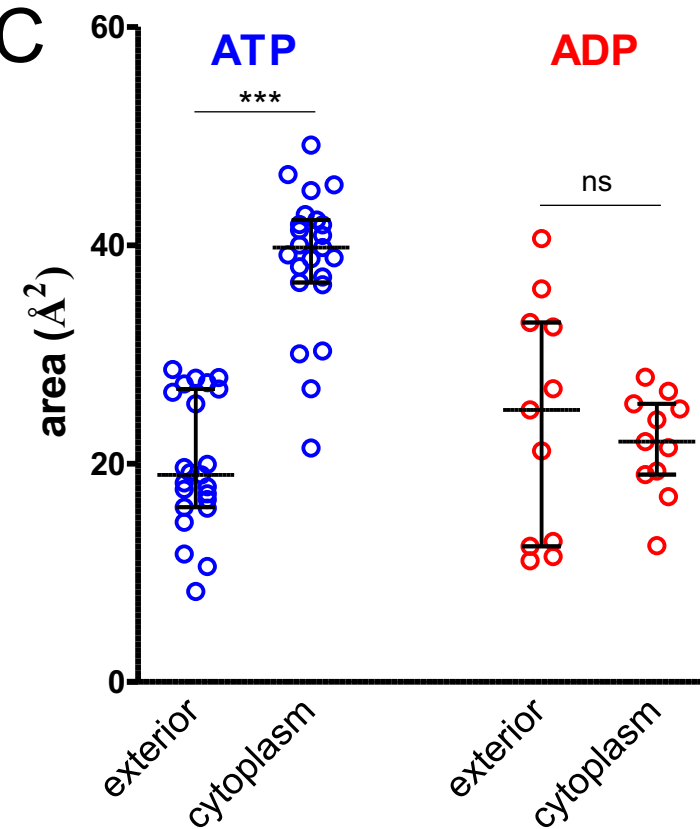

Supplement: supp [file elife-41803-supp-v1.zip › elife_poa_e41803_Figure_4_figure_supplement_1.pdf]

Figure 2 – figure supplement 4

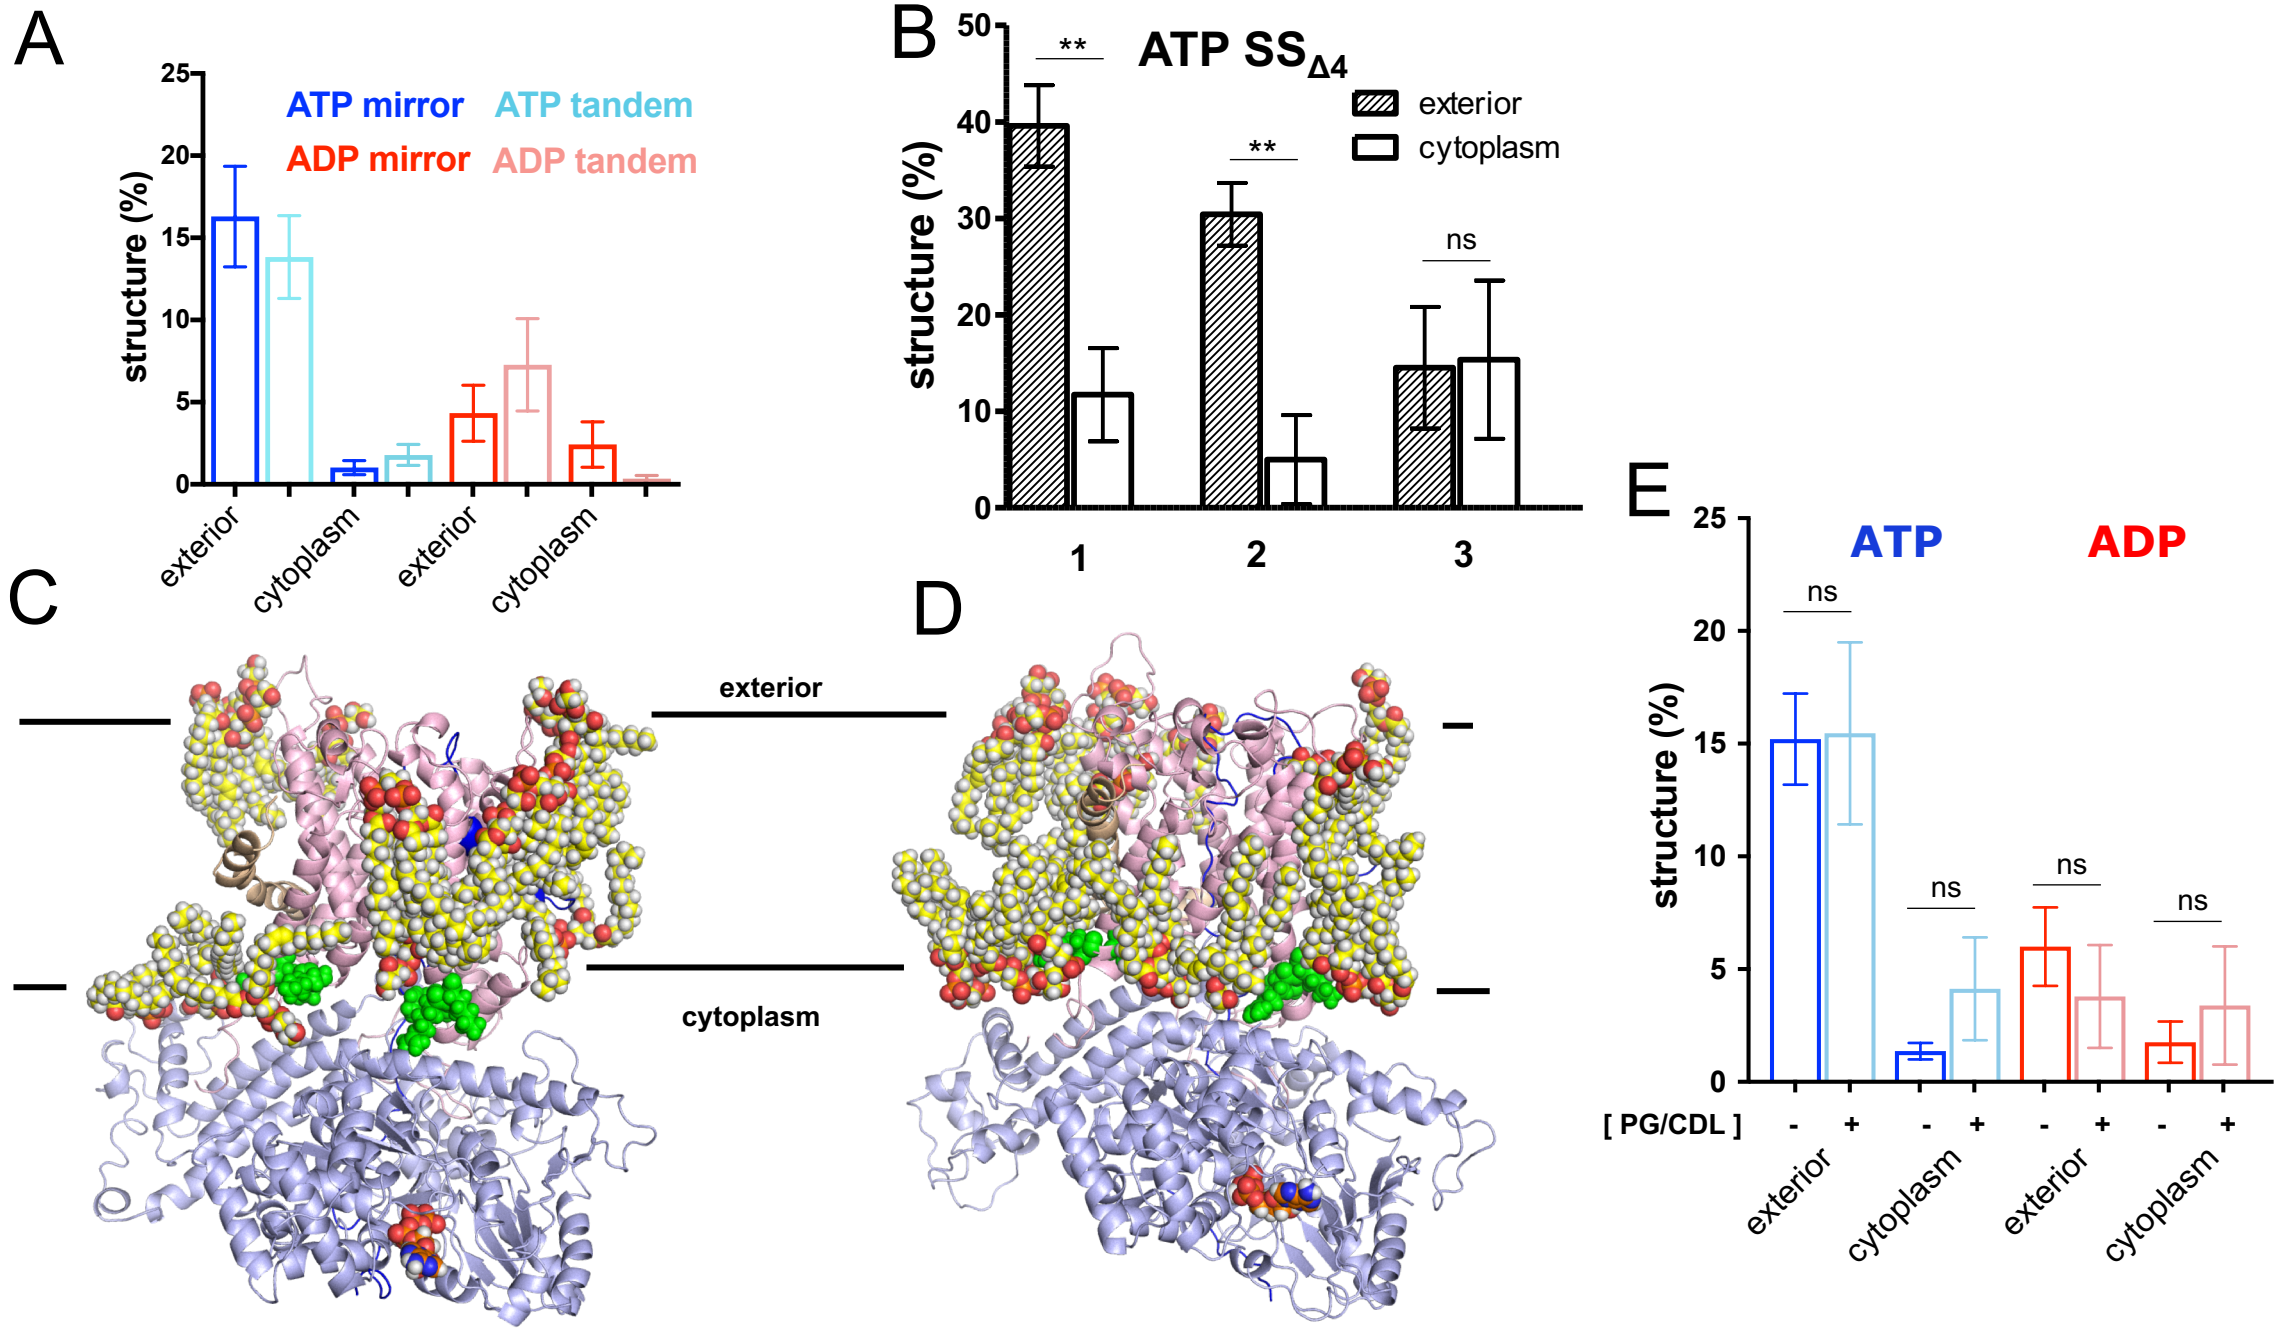

Supplement: supp [file elife-41803-supp-v1.zip › elife_poa_e41803_Figure_2_figure_supplement_4.pdf]

**Figure 2 – figure supplement 2**

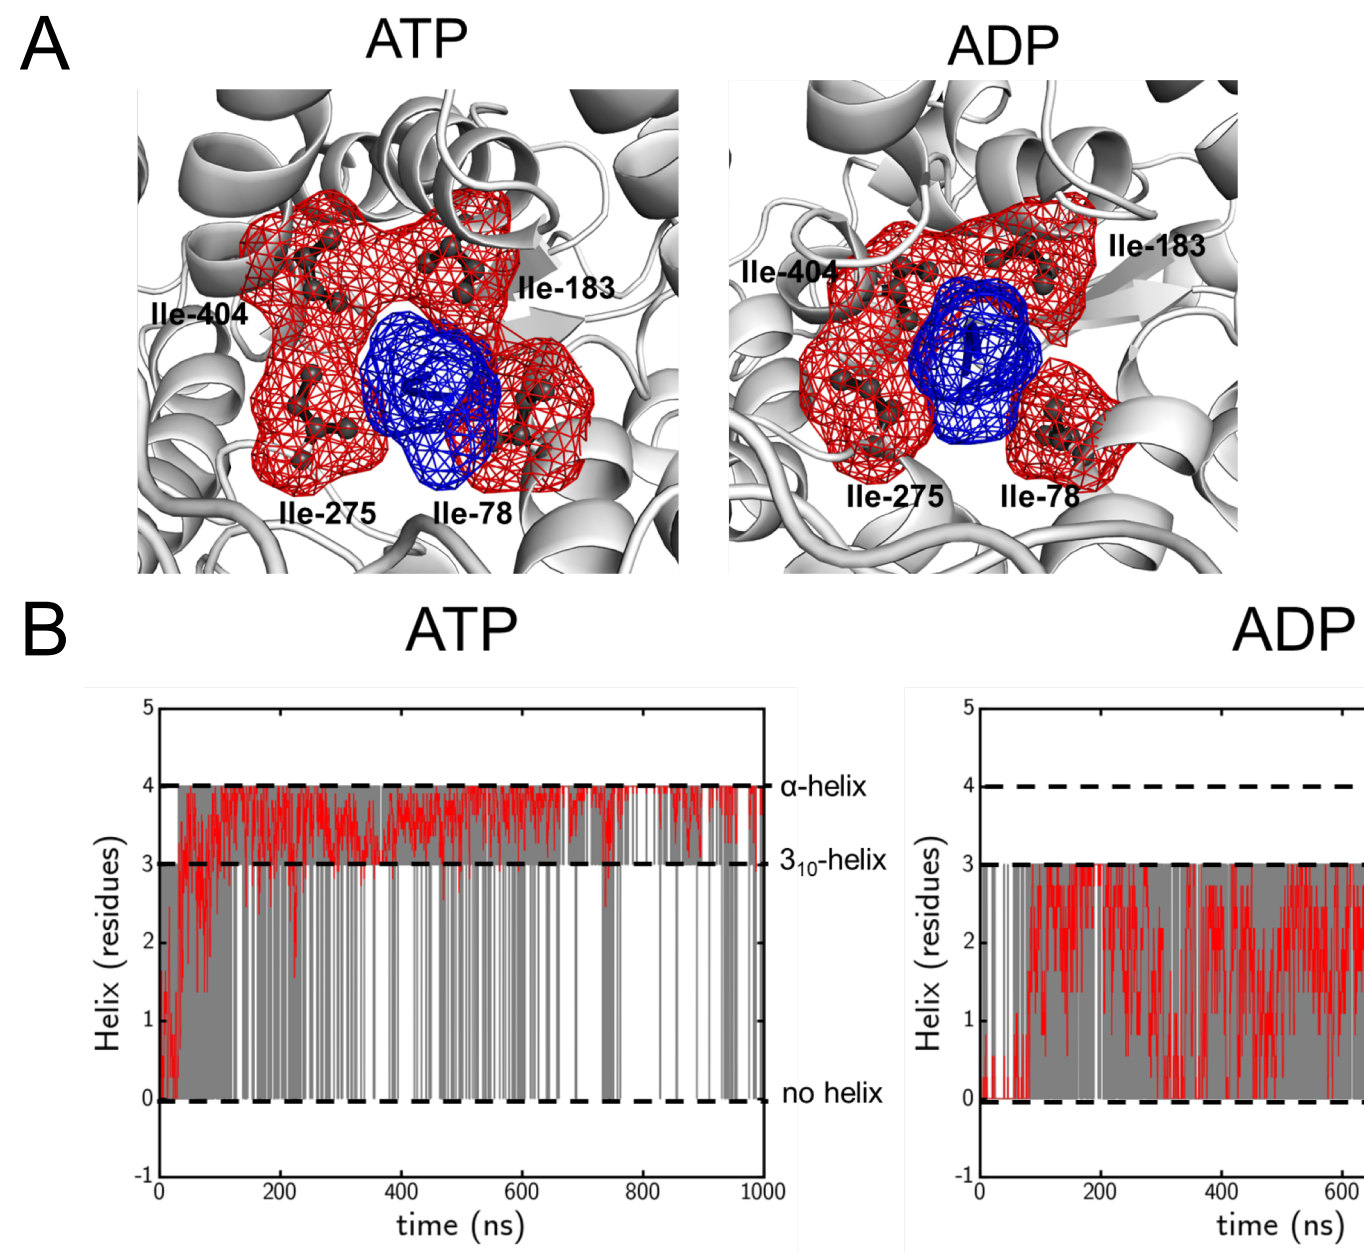

Supplement: supp [file elife-41803-supp-v1.zip › elife_poa_e41803_Figure_2_figure_supplement_2.pdf]

**Figure 3 – figure supplement 2**

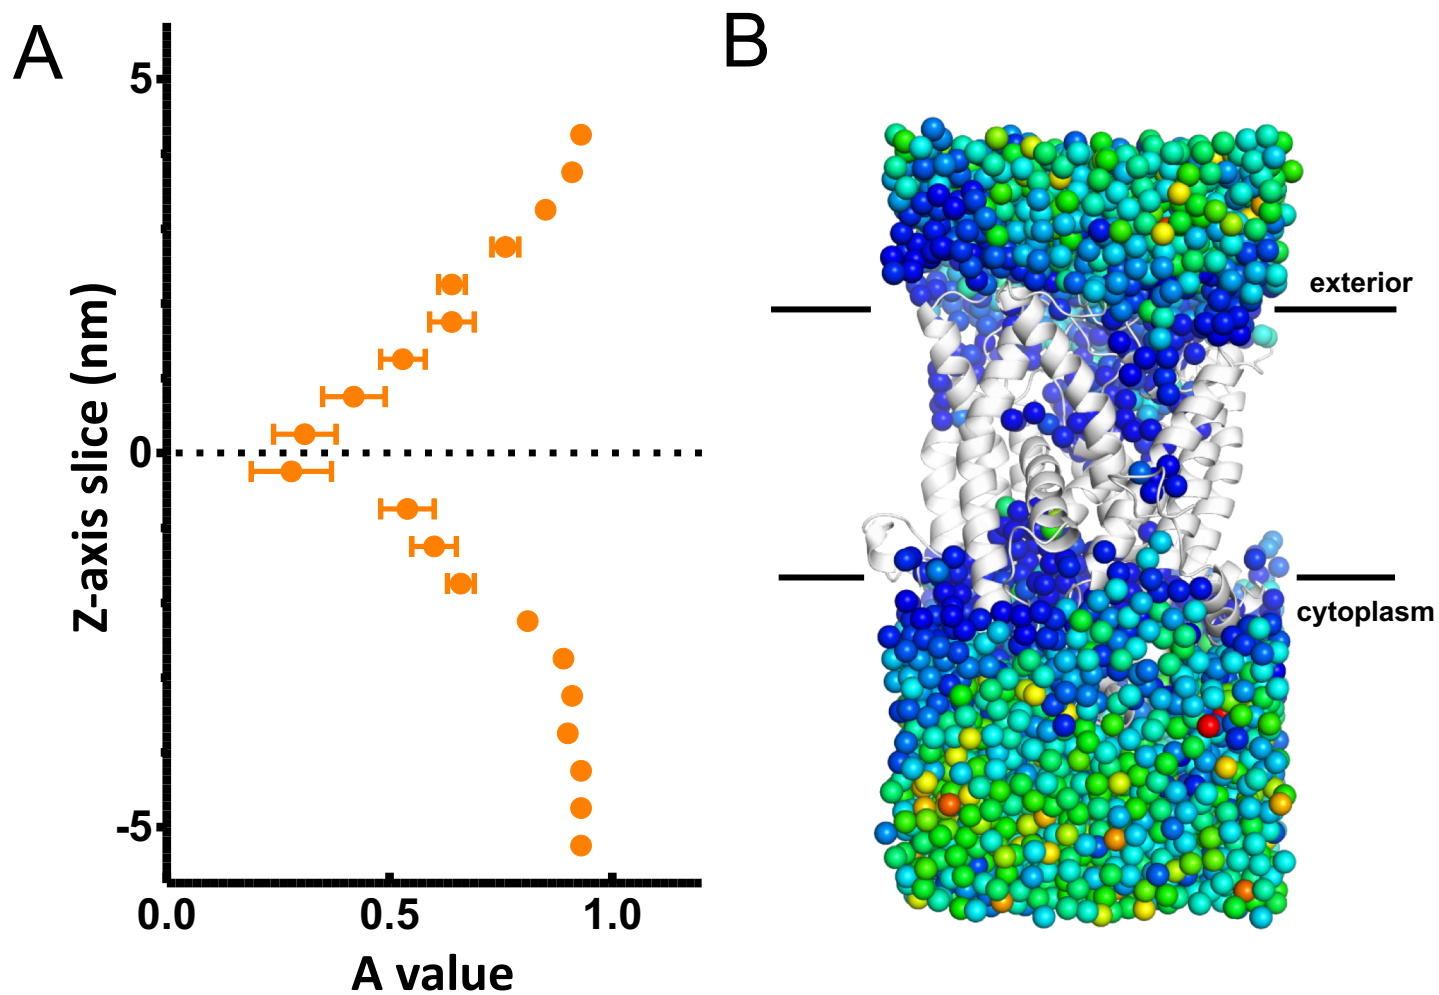

Supplement: supp [file elife-41803-supp-v1.zip › elife_poa_e41803_Figure_3_figure_supplement_2.pdf]

Figure 5 – figure supplement 1

A

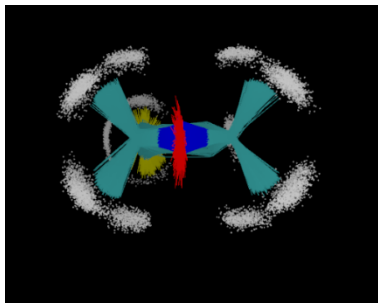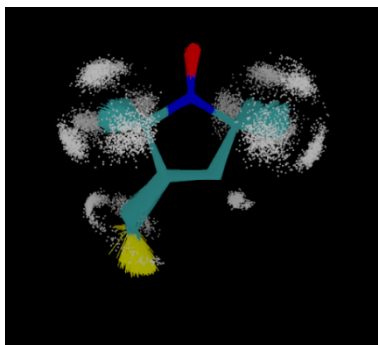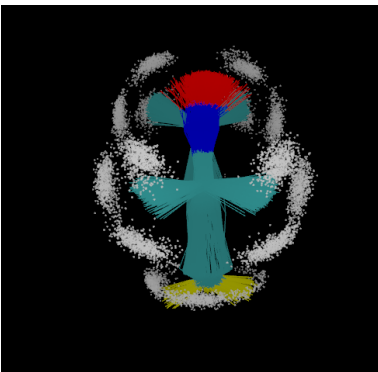

B

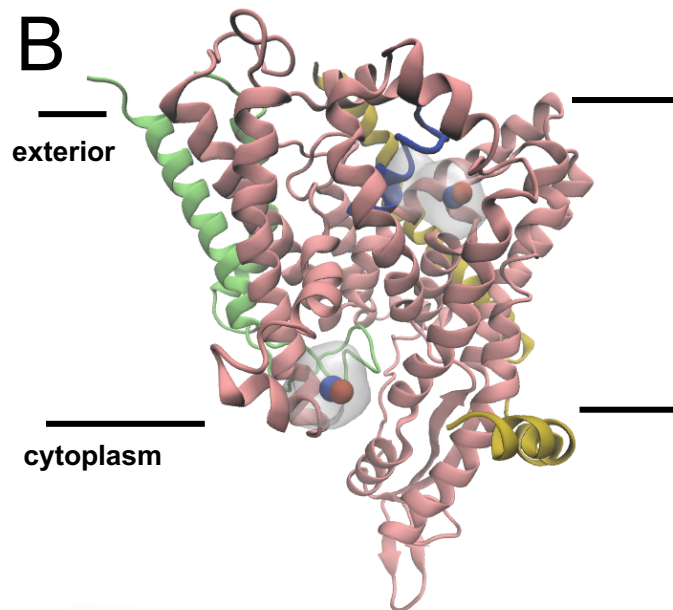

C

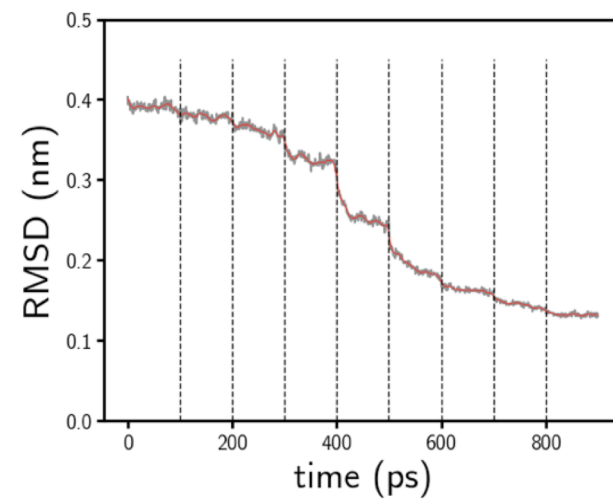

D

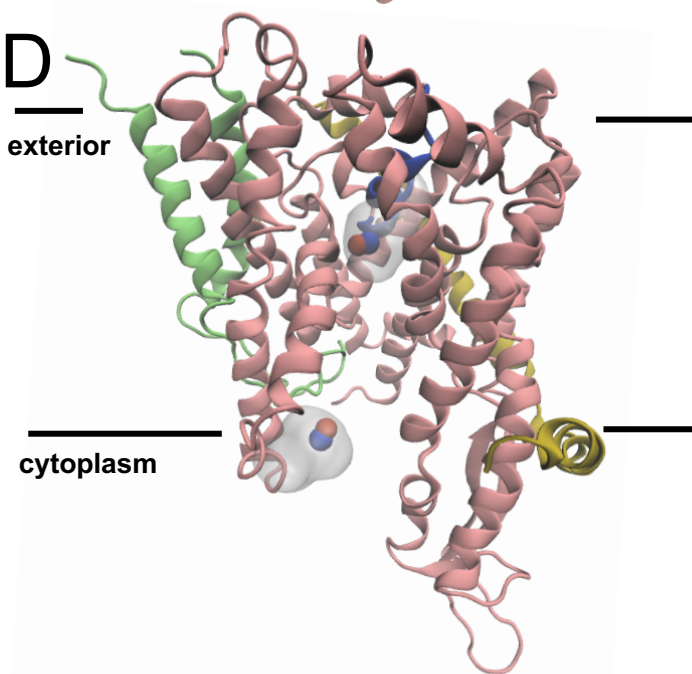

Supplement: supp [file elife-41803-supp-v1.zip › elife_poa_e41803_Figure_5_figure_supplement_1.pdf]

Figure 2 – figure supplement 3

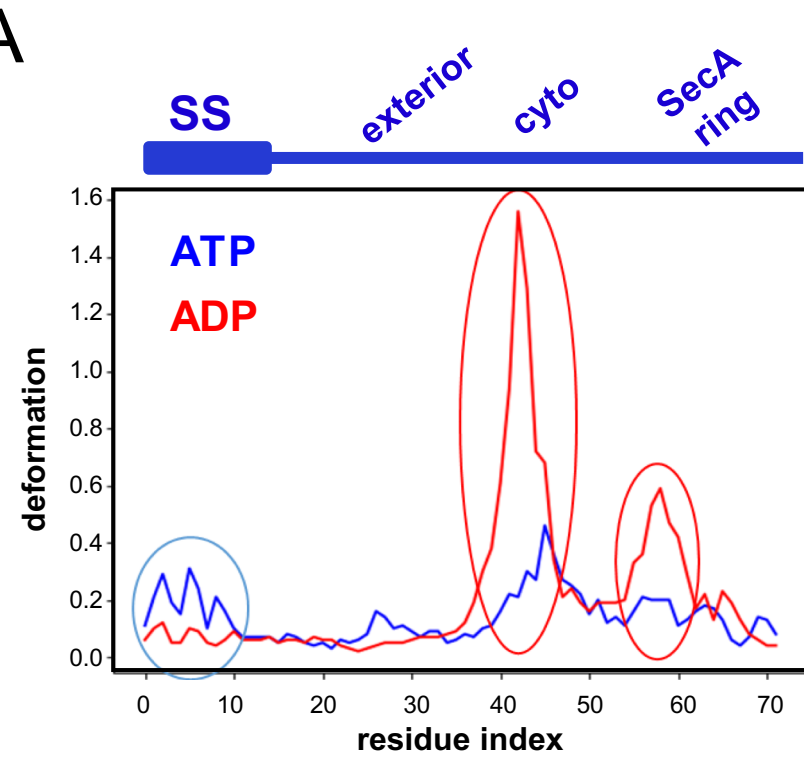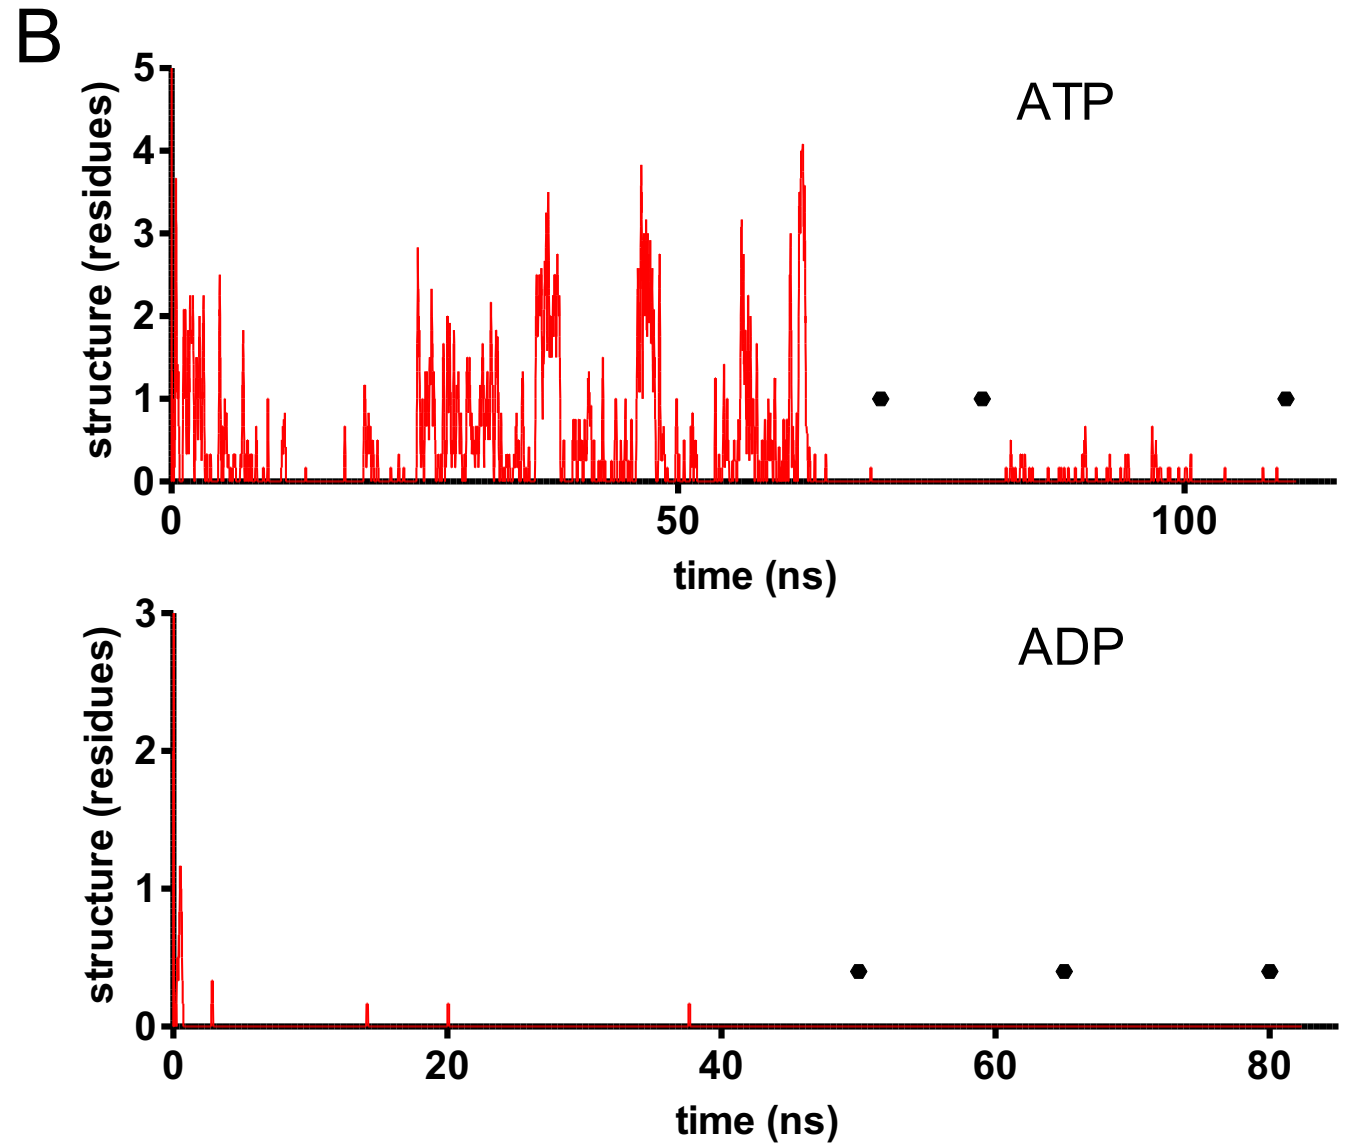

Supplement: supp [file elife-41803-supp-v1.zip › elife_poa_e41803_Figure_2_figure_supplement_3.pdf]
